# Supplementary material for: Molecular characterization and differential effects of levofloxacin and ciprofloxacin on the potential for developing quinolone resistance among clinical Pseudomonas aeruginosa isolates
Source: PubMed Central journal article supplement (PMC10514475; doi:10.3389/fmicb.2023.1209224), 2023-09-08
Supplement: Data_Sheet_1.pdf [file Data_Sheet_1.pdf]

## *Supplementary Material*

### Supplementary Tables

Table S1: Broth microdilution results of the 19 *P. aeruginosa* isolates against ciprofloxacin and levofloxacin before and after induction of resistance (with and without multi-drug efflux pump inhibitor PA $\beta$ N)

| Isolates codes | Antibiotics   | MIC ( $\mu\text{g/mL}$ ) |                      |                   |
|----------------|---------------|--------------------------|----------------------|-------------------|
|                |               | Before induction         | After induction      |                   |
|                |               |                          | Without PA $\beta$ N | With PA $\beta$ N |
| PSA-154        | Ciprofloxacin | 0.125                    | 256                  | 32                |
|                | Levofloxacin  | 0.5                      | 256                  | 16                |
| PSA-021        | Ciprofloxacin | <0.0625                  | 32                   | 16                |
|                | Levofloxacin  | 0.25                     | 32                   | 16                |
| PSA-173b       | Ciprofloxacin | 0.25                     | 64                   | 8                 |
|                | Levofloxacin  | 0.5                      | 64                   | 16                |
| PSA-173a       | Ciprofloxacin | 0.25                     | 32                   | 32                |
|                | Levofloxacin  | 0.5                      | 32                   | 32                |
| PSA-115        | Ciprofloxacin | 0.125                    | 32                   | 4                 |
|                | Levofloxacin  | 0.5                      | 32                   | 4                 |
| PSA-276        | Ciprofloxacin | 0.125                    | 16                   | 8                 |
|                | Levofloxacin  | 0.5                      | 256                  | 32                |
| PSA-242        | Ciprofloxacin | 0.25                     | 16                   | 8                 |
|                | Levofloxacin  | 0.5                      | 64                   | 32                |
| PSA-025        | Ciprofloxacin | 0.125                    | 256                  | 128               |
|                | Levofloxacin  | 0.5                      | 32                   | 16                |
| PSA-026        | Ciprofloxacin | 0.25                     | 32                   | 16                |
|                | Levofloxacin  | 0.5                      | 64                   | 32                |
| PSA-186        | Ciprofloxacin | 0.125                    | 32                   | 16                |
|                | Levofloxacin  | 0.5                      | 128                  | 64                |
| PSA-118a       | Ciprofloxacin | 0.25                     | 128                  | 64                |
|                | Levofloxacin  | 0.5                      | 128                  | 64                |

|          |               |       |     |    |
|----------|---------------|-------|-----|----|
| PSA-192  | Ciprofloxacin | 0.125 | 16  | 8  |
|          | Levofloxacin  | 0.25  | 32  | 16 |
| PSA-182  | Ciprofloxacin | 0.125 | 16  | 4  |
|          | Levofloxacin  | 0.5   | 16  | 4  |
| PSA-058  | Ciprofloxacin | 0.125 | 32  | 16 |
|          | Levofloxacin  | 0.5   | 32  | 16 |
| PSA-285b | Ciprofloxacin | 0.125 | 32  | 8  |
|          | Levofloxacin  | 0.5   | 32  | 16 |
| PSA-113a | Ciprofloxacin | 0.25  | 128 | 64 |
|          | Levofloxacin  | 0.5   | 64  | 16 |
| PSA-124  | Ciprofloxacin | 0.25  | 16  | 16 |
|          | Levofloxacin  | 0.5   | 16  | 8  |
| PSA-092  | Ciprofloxacin | 0.125 | 64  | 8  |
|          | Levofloxacin  | 0.25  | 16  | 8  |
| PSA-146b | Ciprofloxacin | 0.125 | 32  | 16 |
|          | Levofloxacin  | 0.5   | 32  | 8  |

# Supplementary Figures

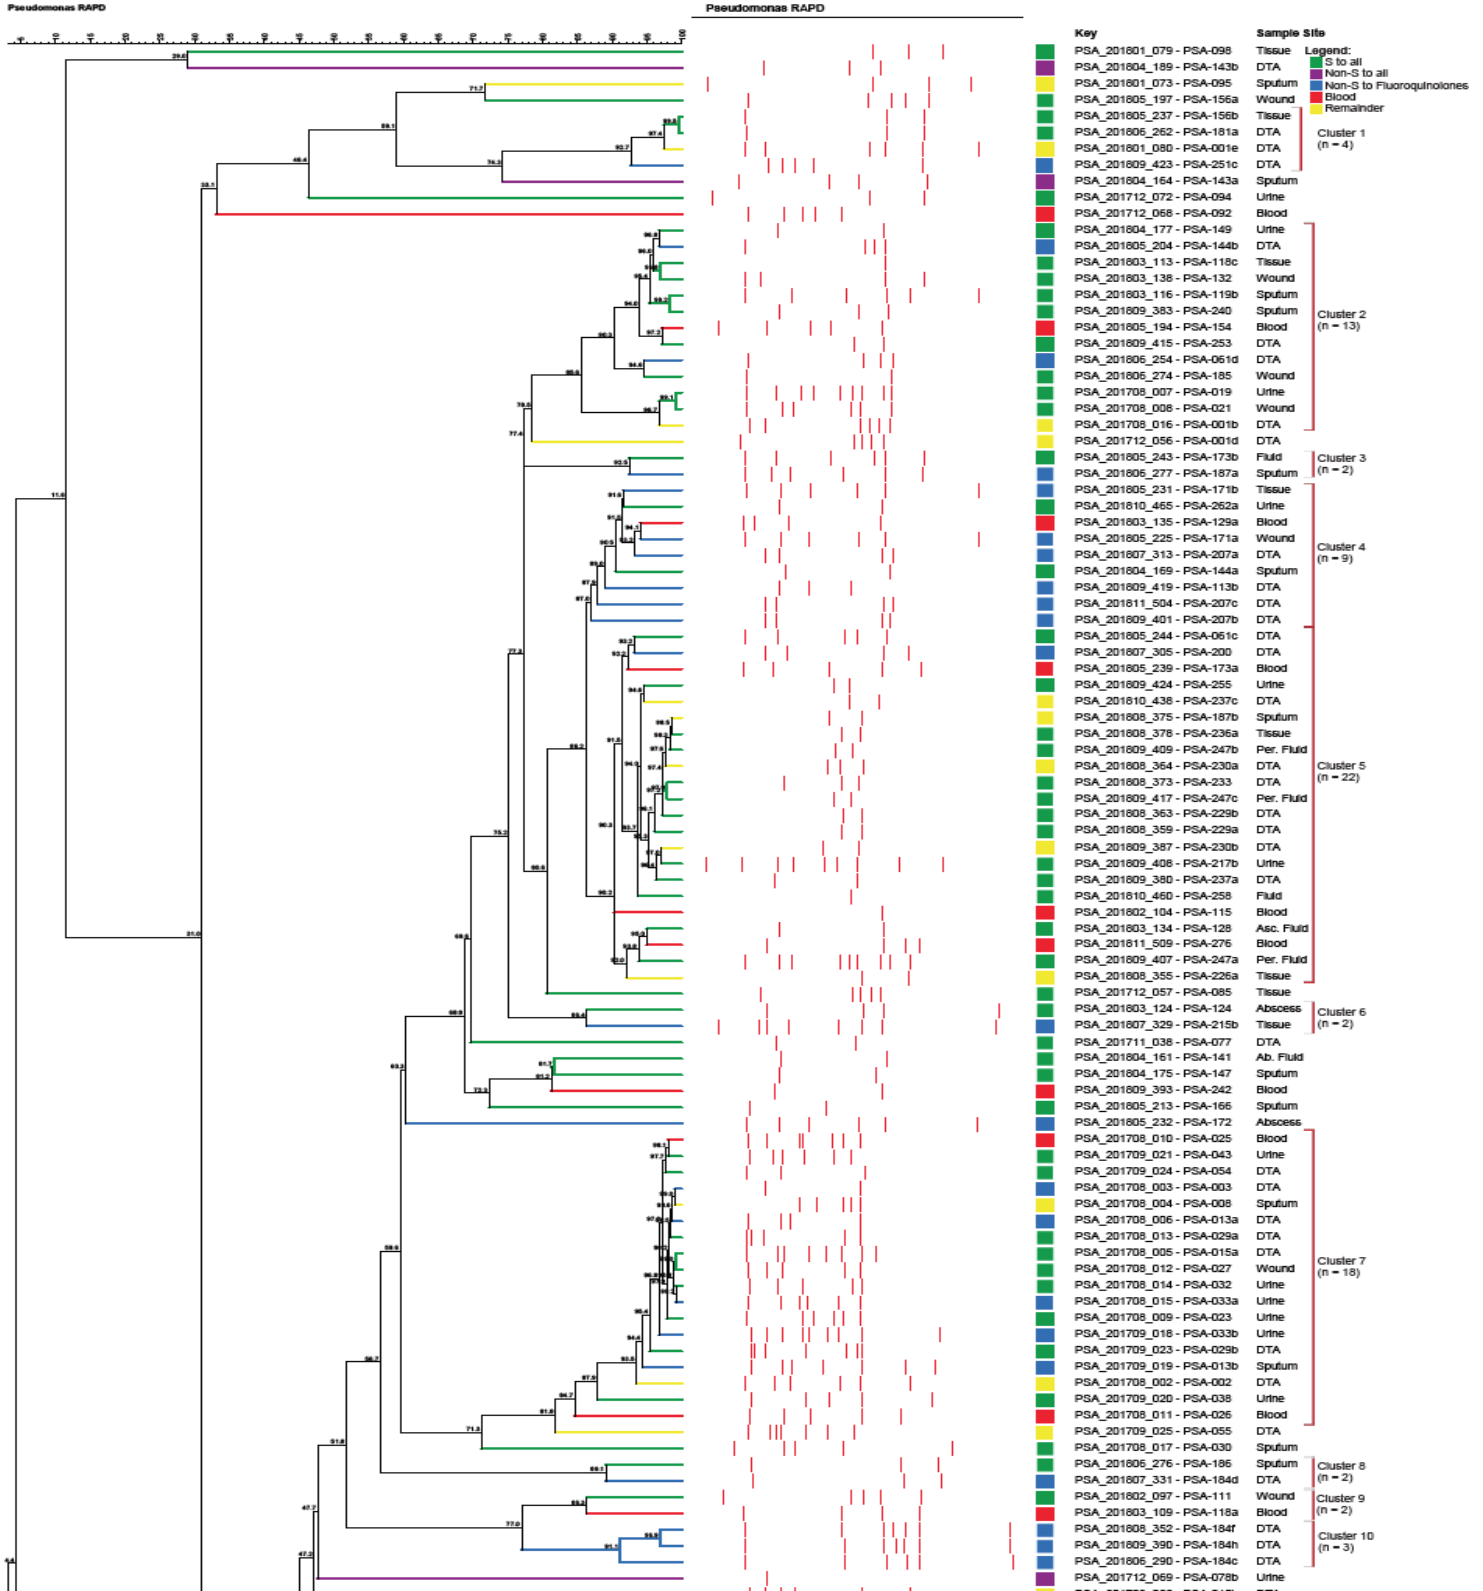

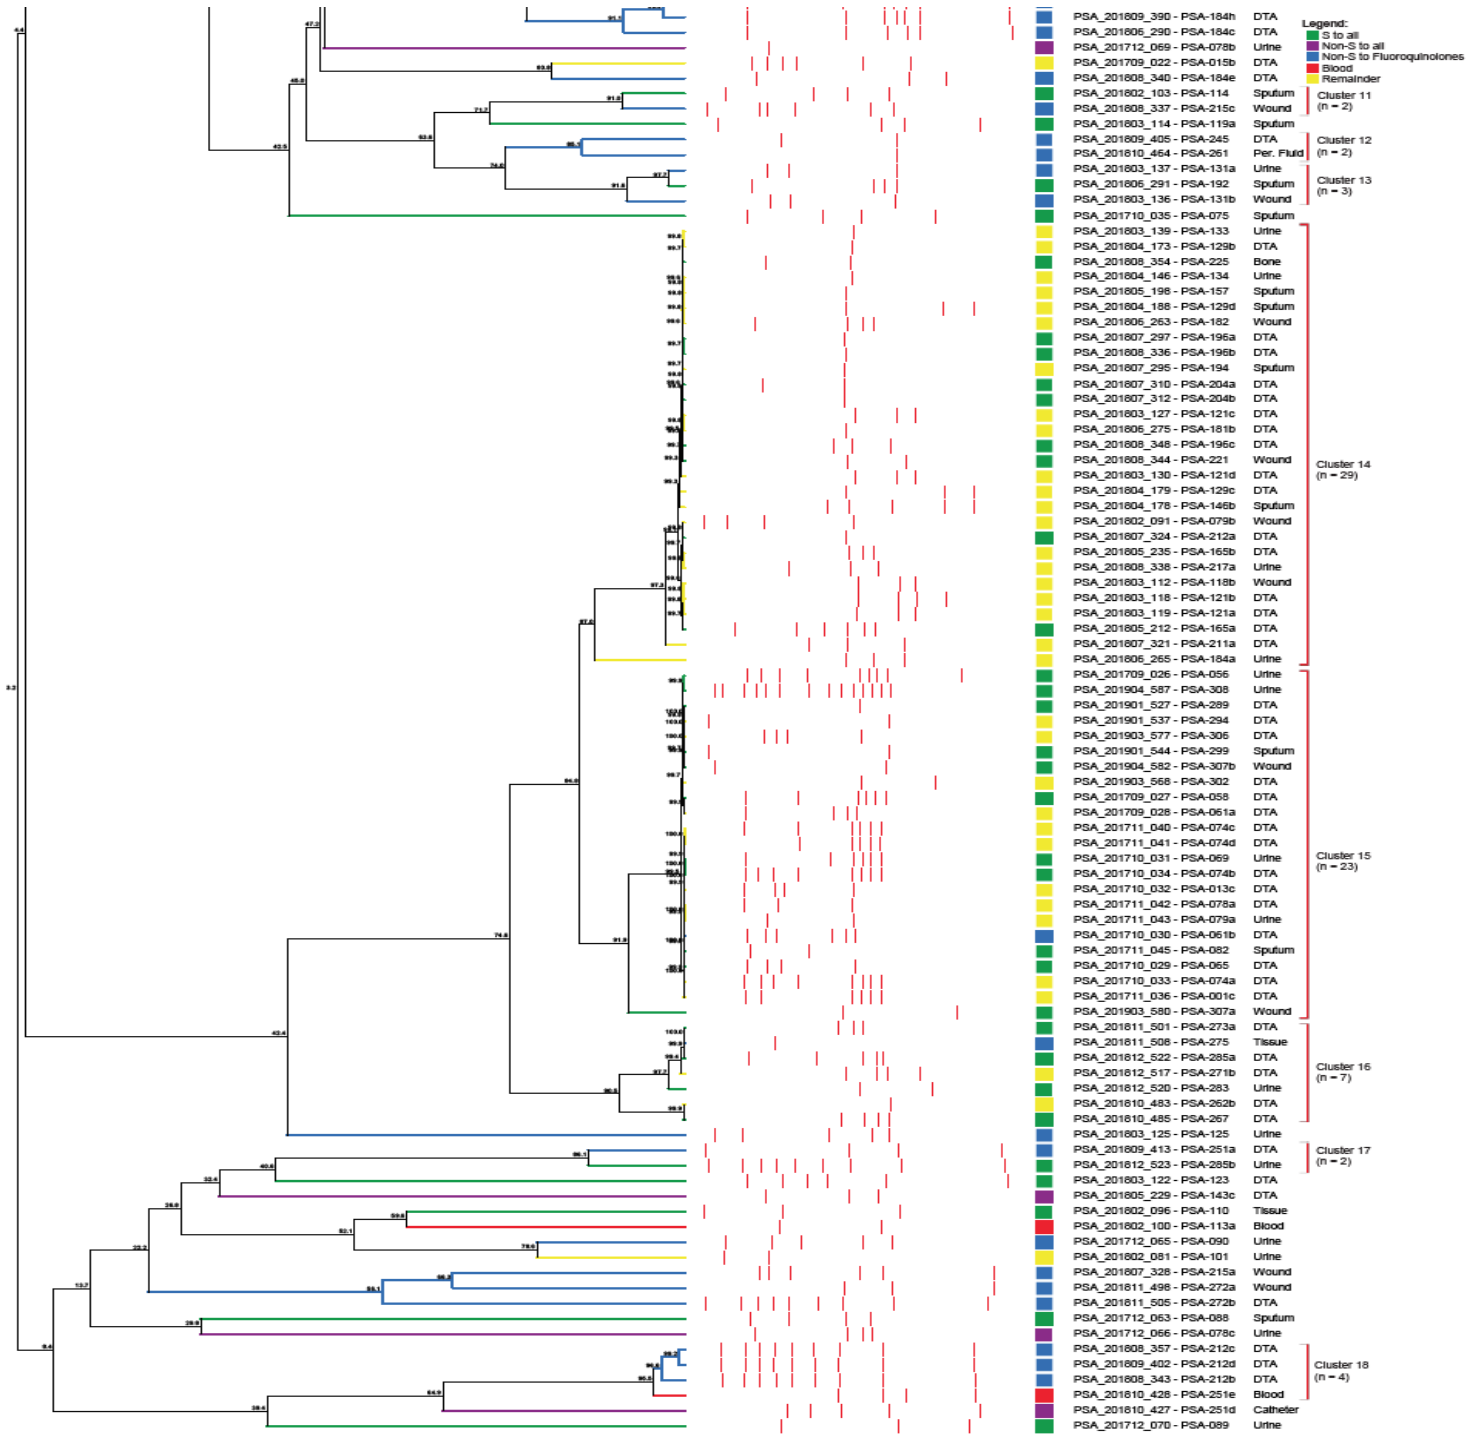

Figure S1: The UPGMA dendrogram of all isolates that were analyzed by RAPD.

Color coding indicates the group that each isolate belongs to. Red side brackets indicate clusters for similarity.



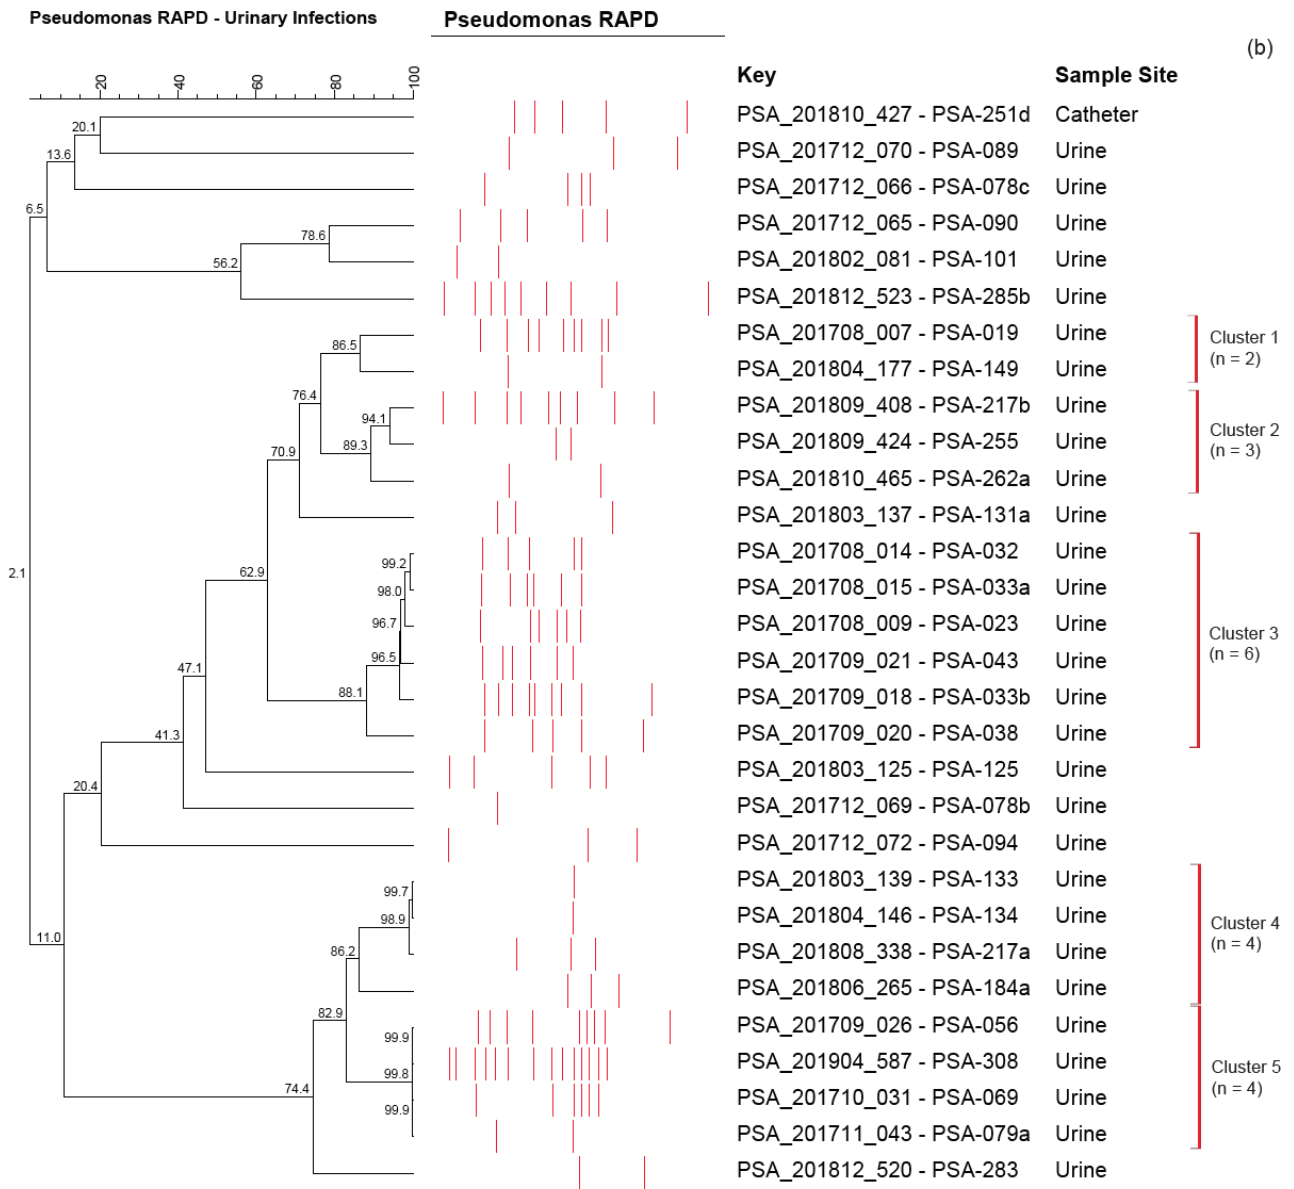

Figure S3: The UPGMA dendrogram of select isolates sampled from urine

Red side brackets indicate clusters of similarity.

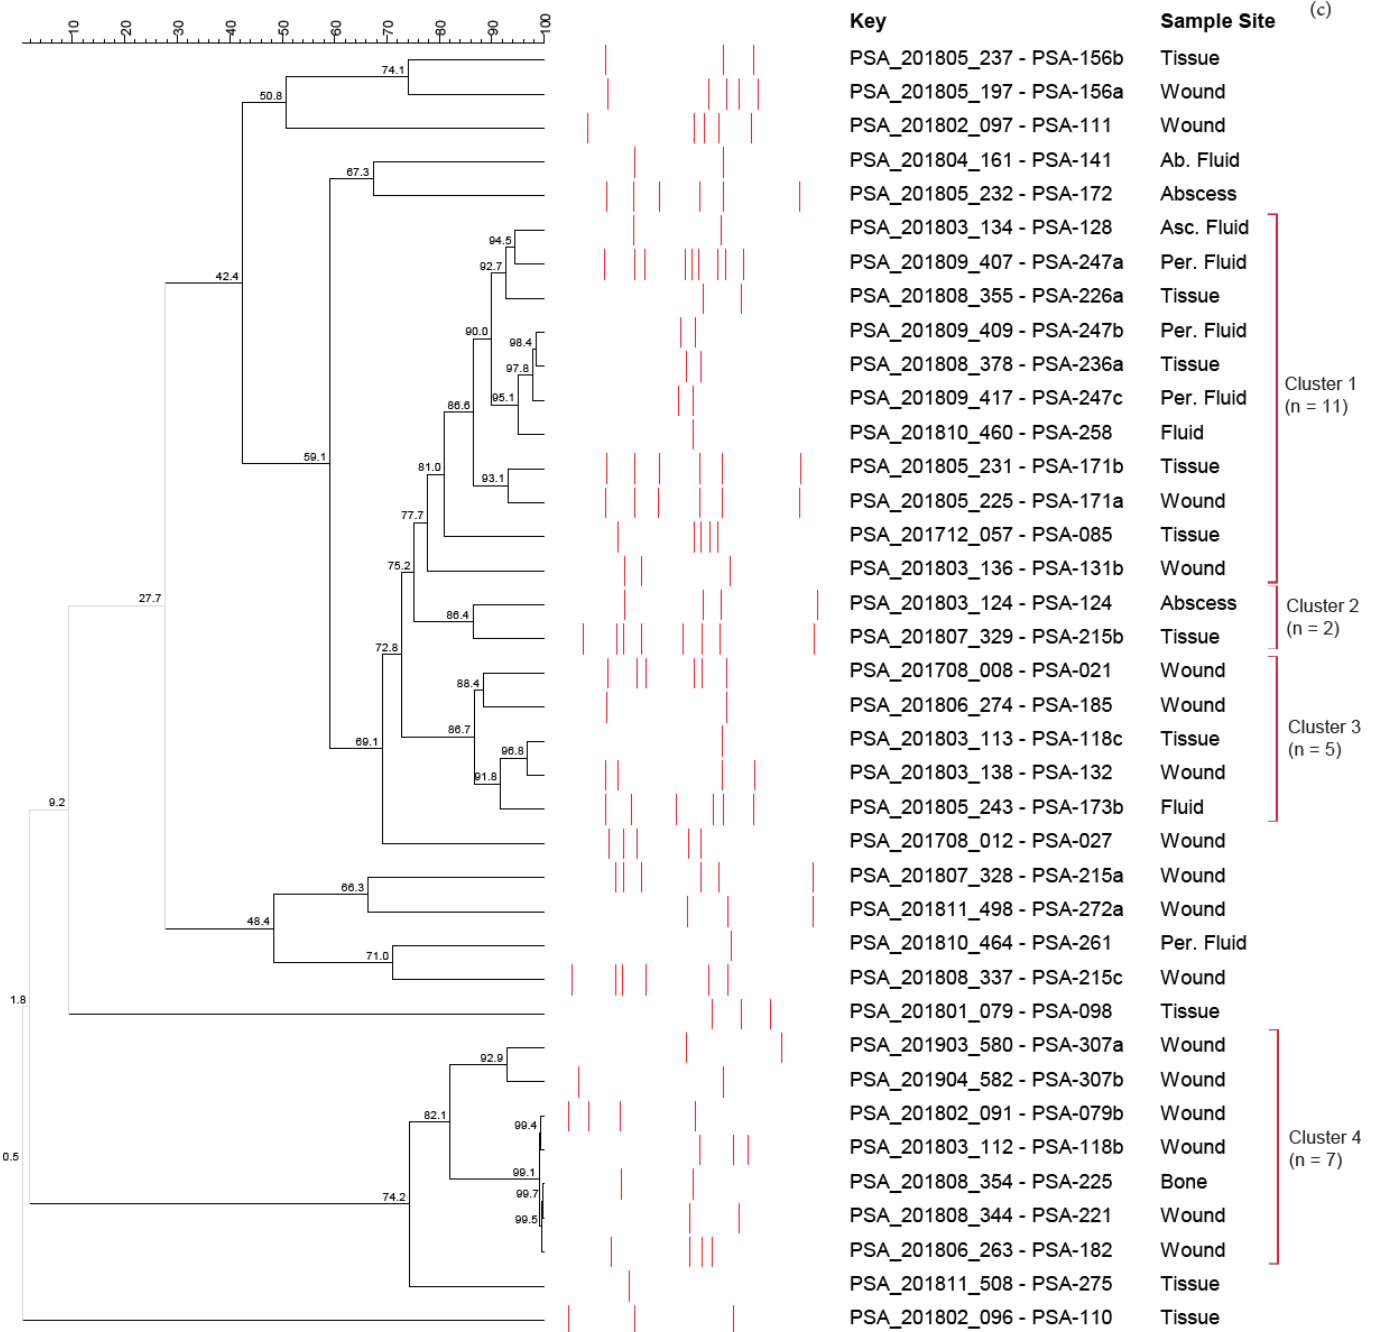

Figure S4: The UPGMA dendrogram of select isolates sampled from bone and soft tissue sites

Red side brackets indicate clusters of similarity.

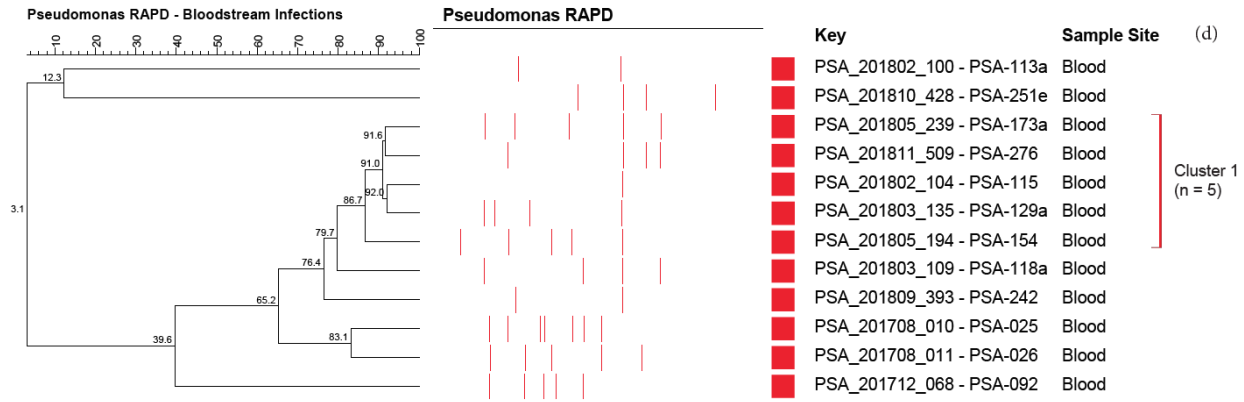

Figure S5: The UPGMA dendrogram of select isolates sampled from blood

Red side brackets indicate clusters of similarity.



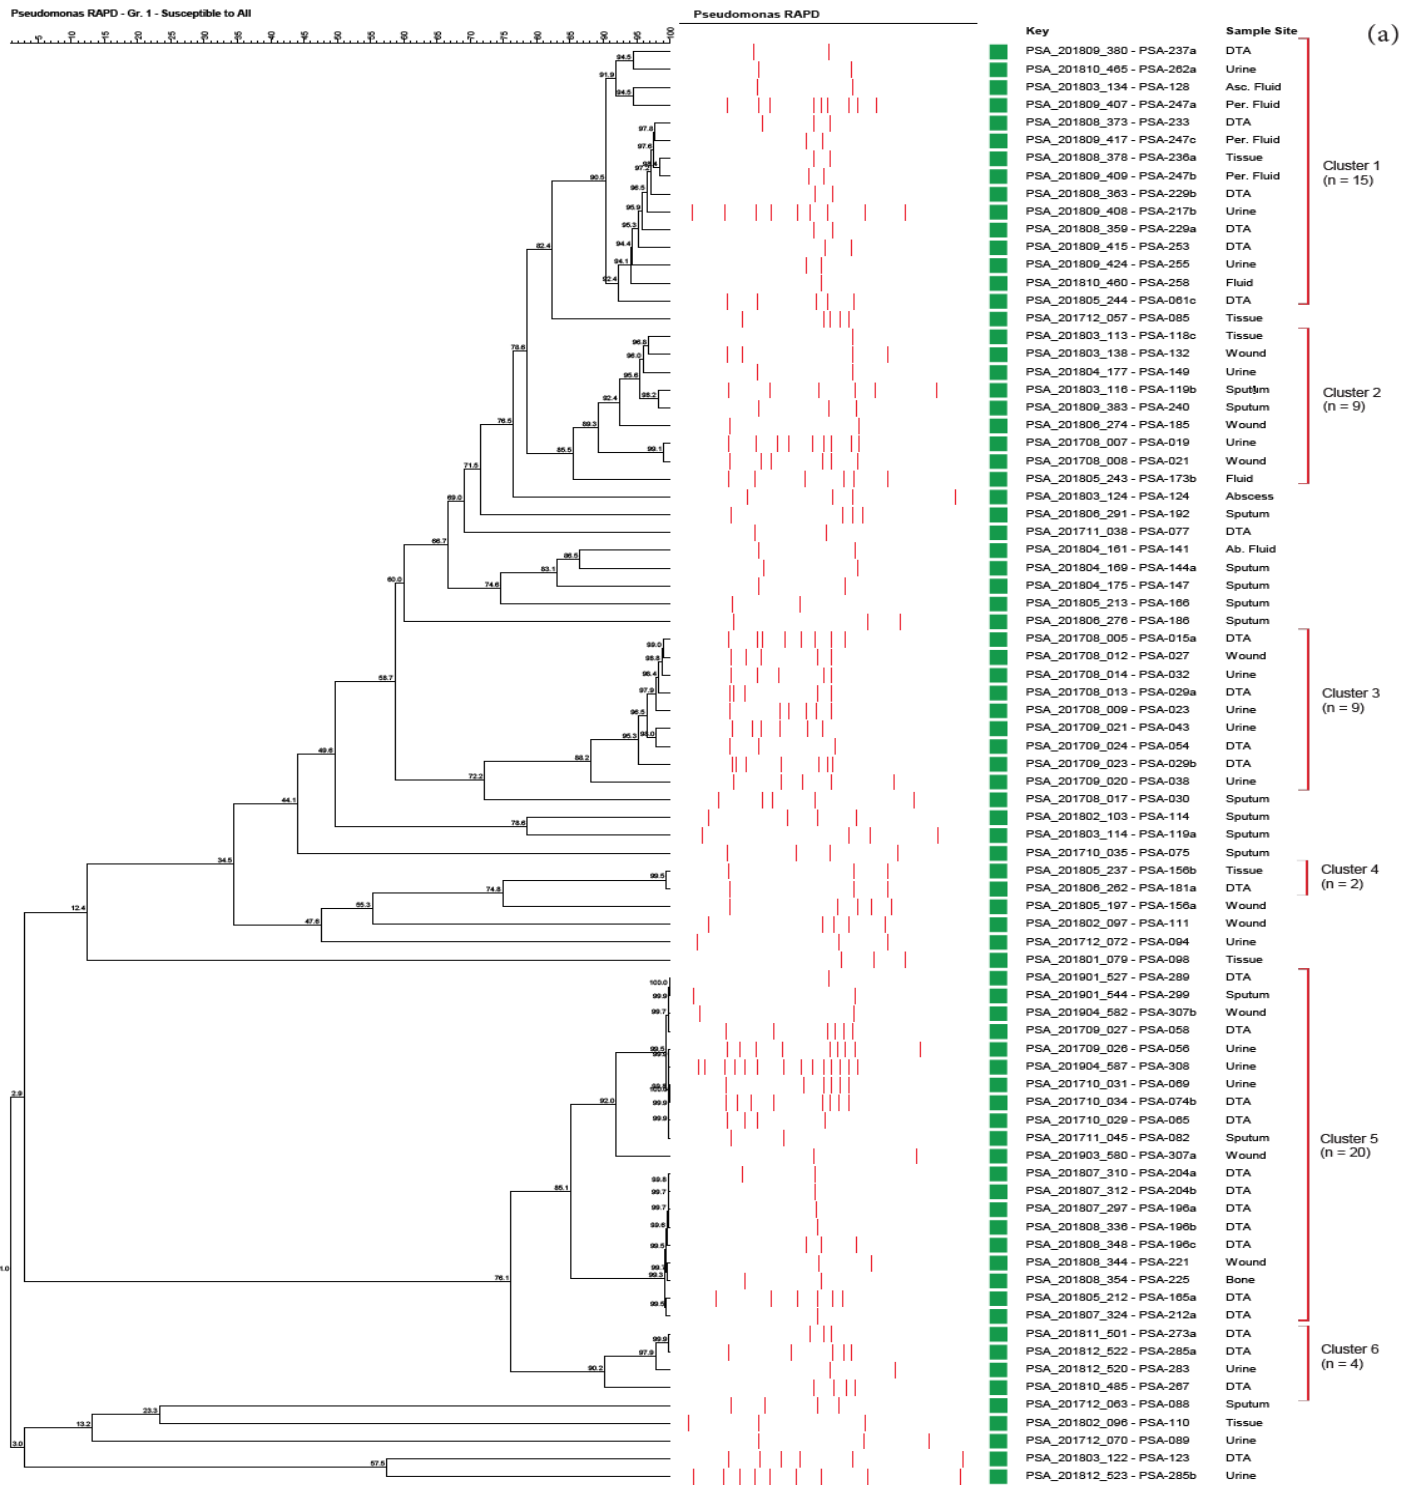

Figure S6: The UPGMA dendrogram of select isolates that are susceptible to all tested antibiotics.

Red side brackets indicate clusters of similarity

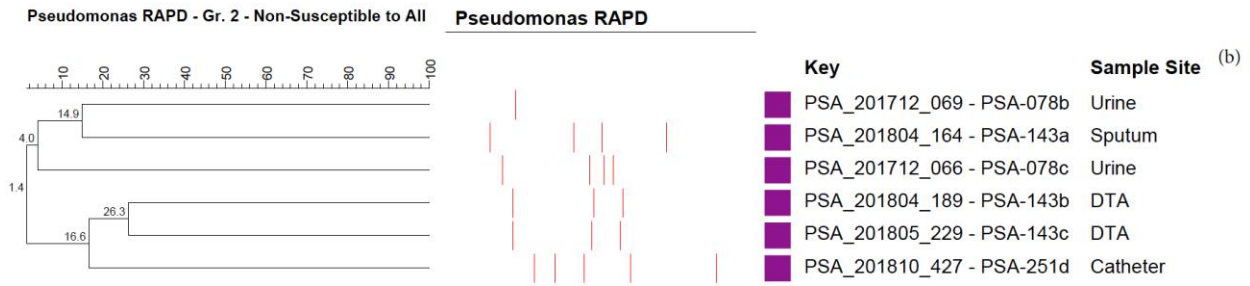

Figure S7: The UPGMA dendrogram of select isolates that are non-susceptible to all tested antibiotics.

Red side brackets indicate clusters of similarity

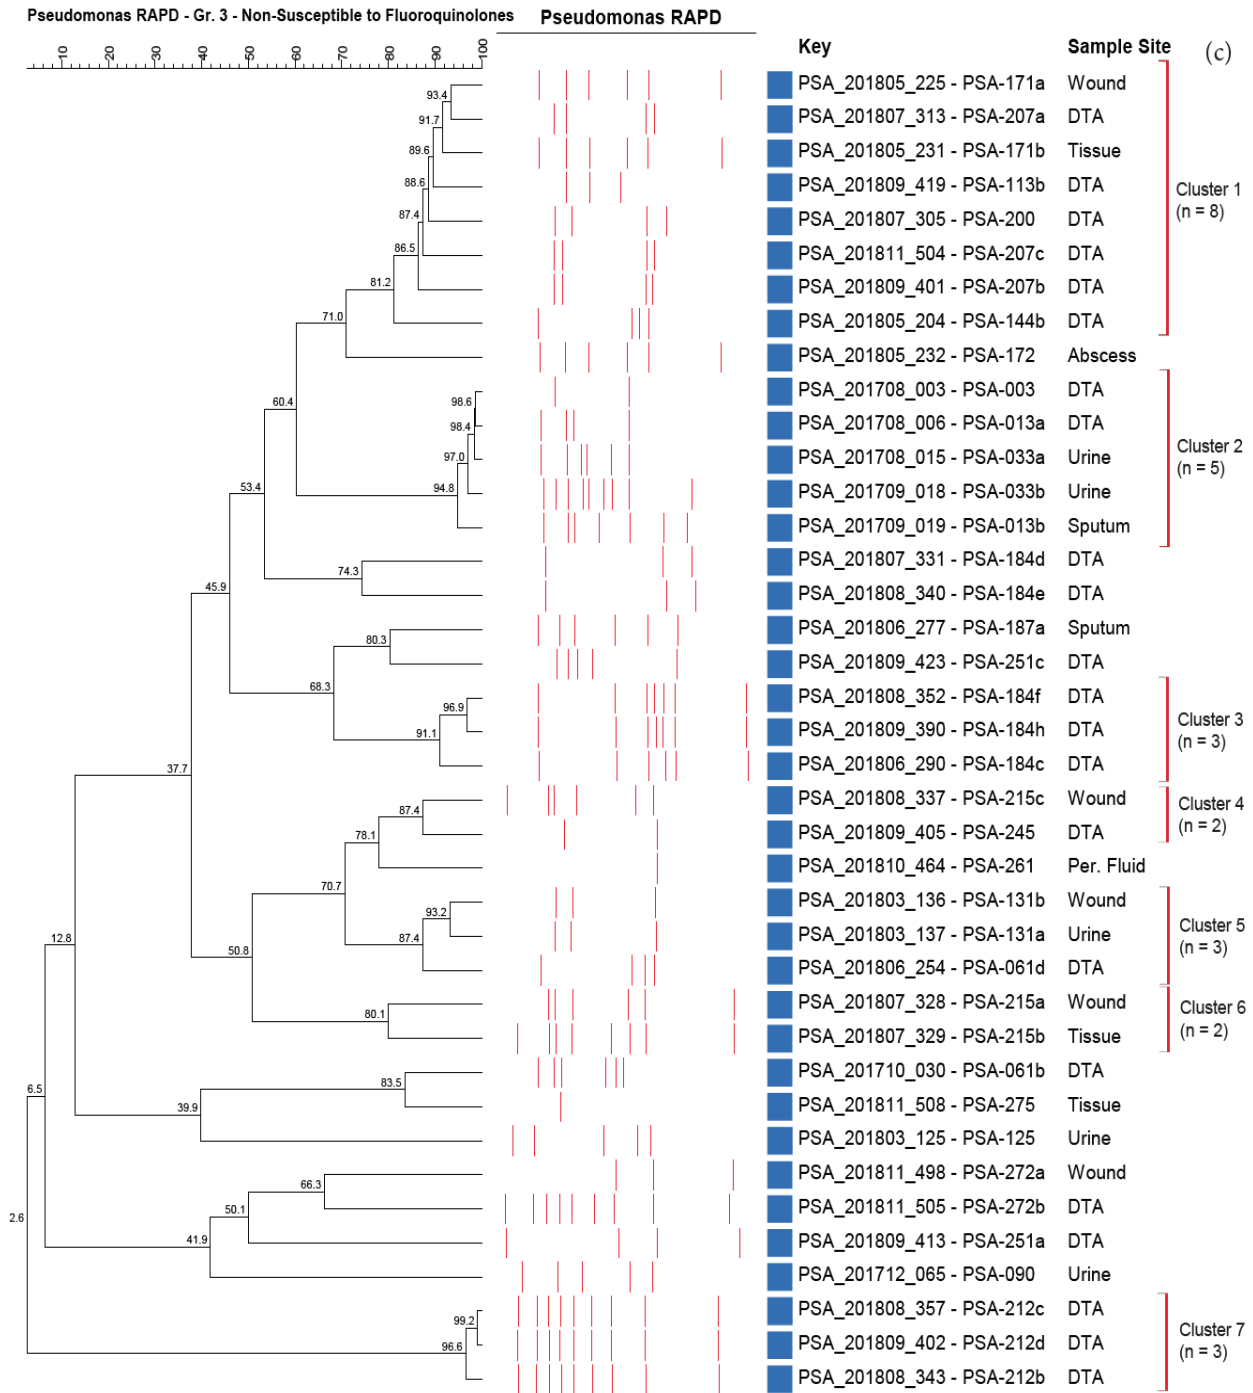

Figure S8: The UPGMA dendrogram of select isolates that are non-susceptible to fluoroquinolones.

Red side brackets indicate clusters of similarity

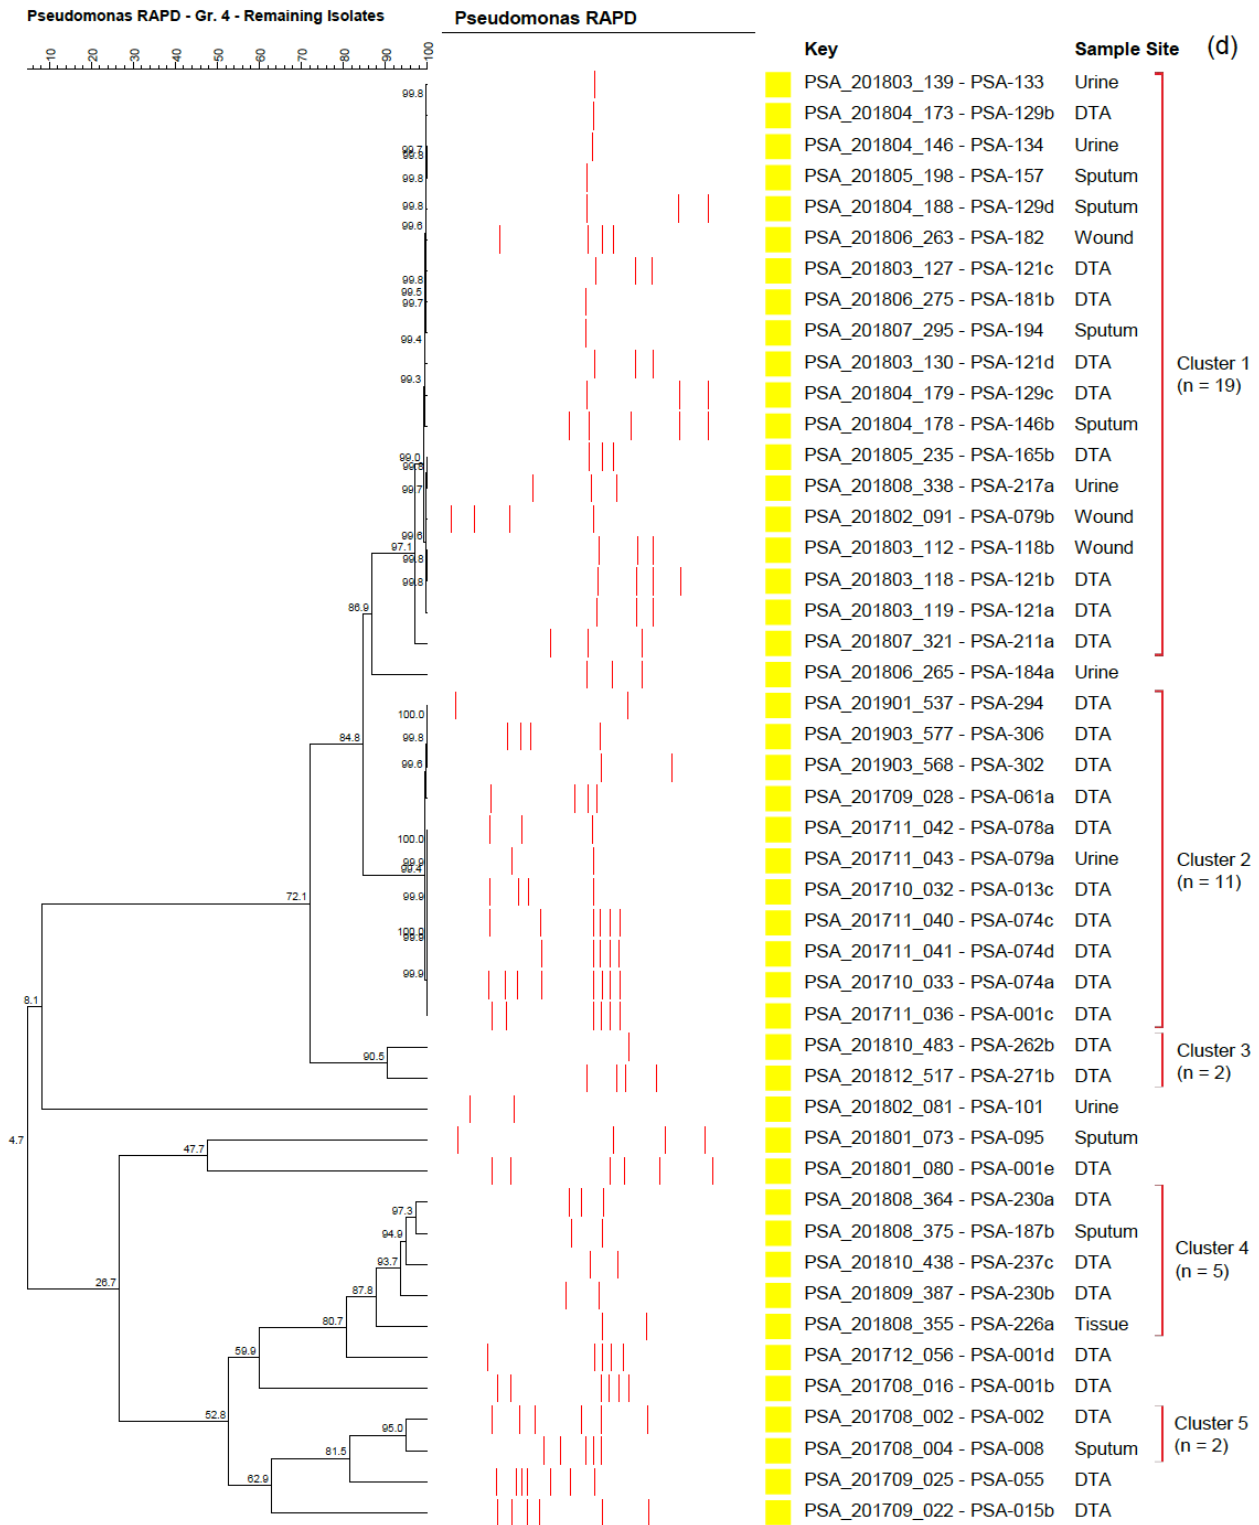

Figure S9: The UPGMA dendrogram of select isolates that are grouped as remaining isolates

Red side brackets indicate clusters of similarity

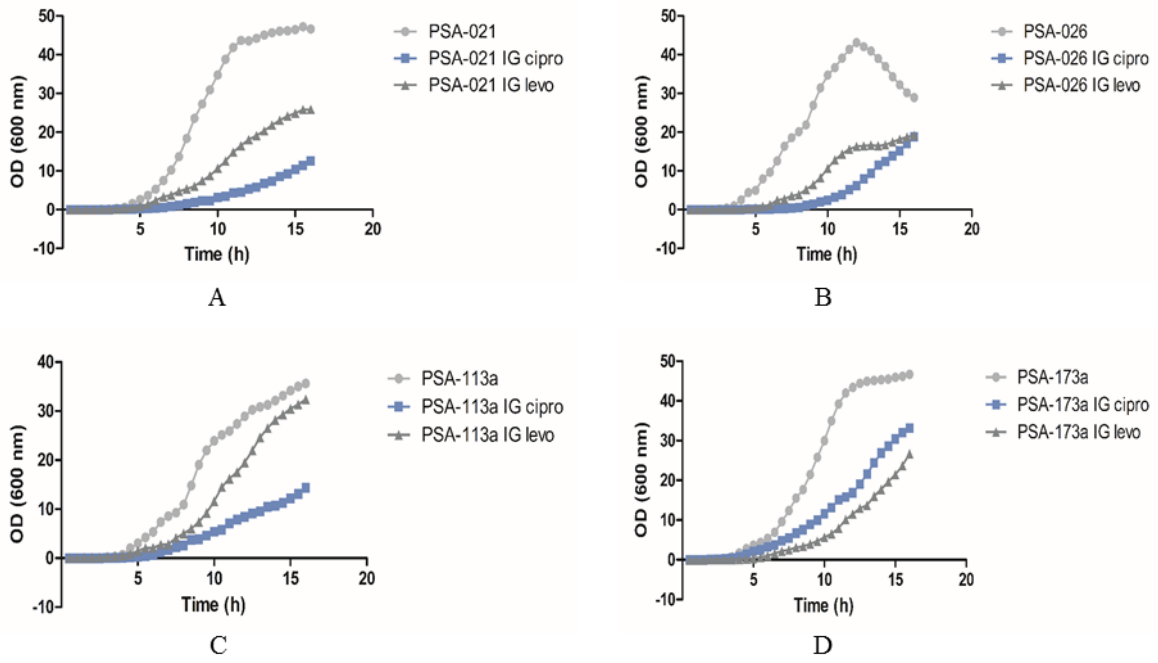

Figure S10: Fitness cost assay results of isolates PSA-021, PSA-026, PSA-113a and PSA-173a compared to their induced mutants

IG cipro: induced against ciprofloxacin; IG levo: induced against levofloxacin

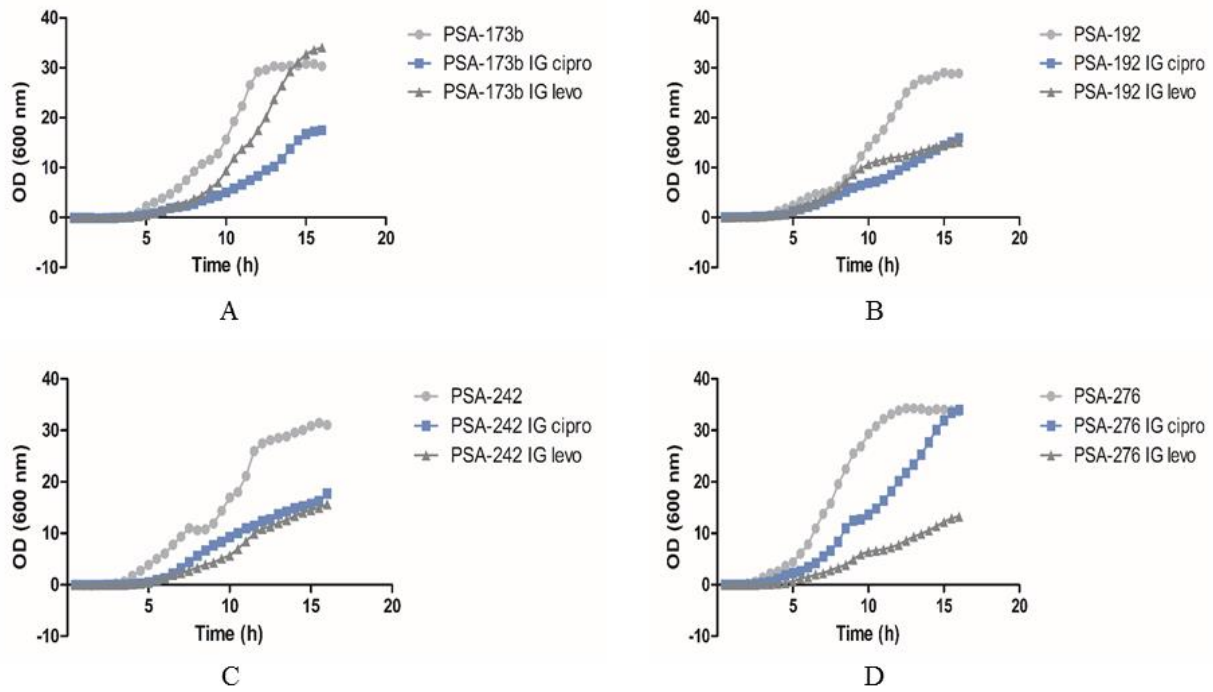

Figure S11: Fitness cost assay results of isolates PSA-173b, PSA-192, PSA-242 and PSA-276 compared to their induced mutants

IG cipro: induced against ciprofloxacin; IG levo: induced against levofloxacin

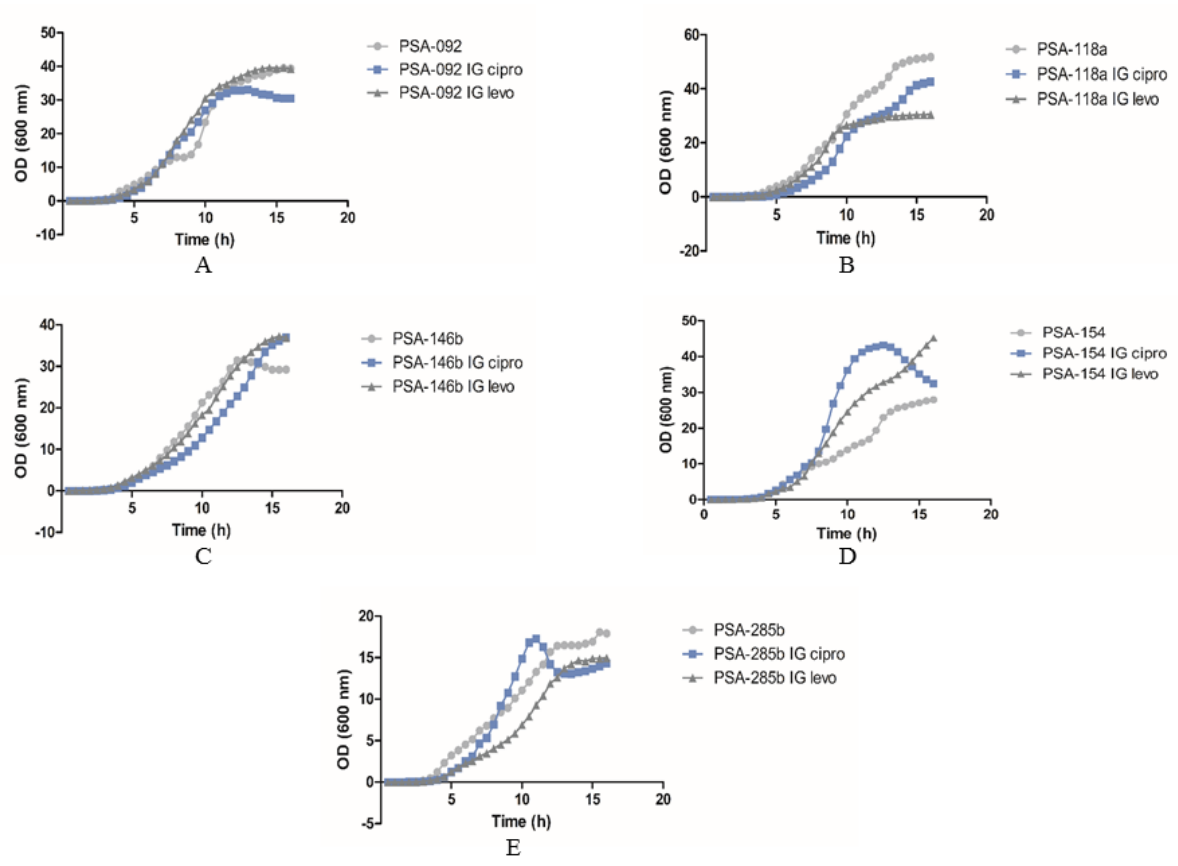

Figure S12: Fitness cost assay results of isolates PSA-092, PSA-118a, PSA-146b, PSA-154 and PSA-285b compared to their induced mutants

IG cipro: induced against ciprofloxacin; IG levo: induced against levofloxacin

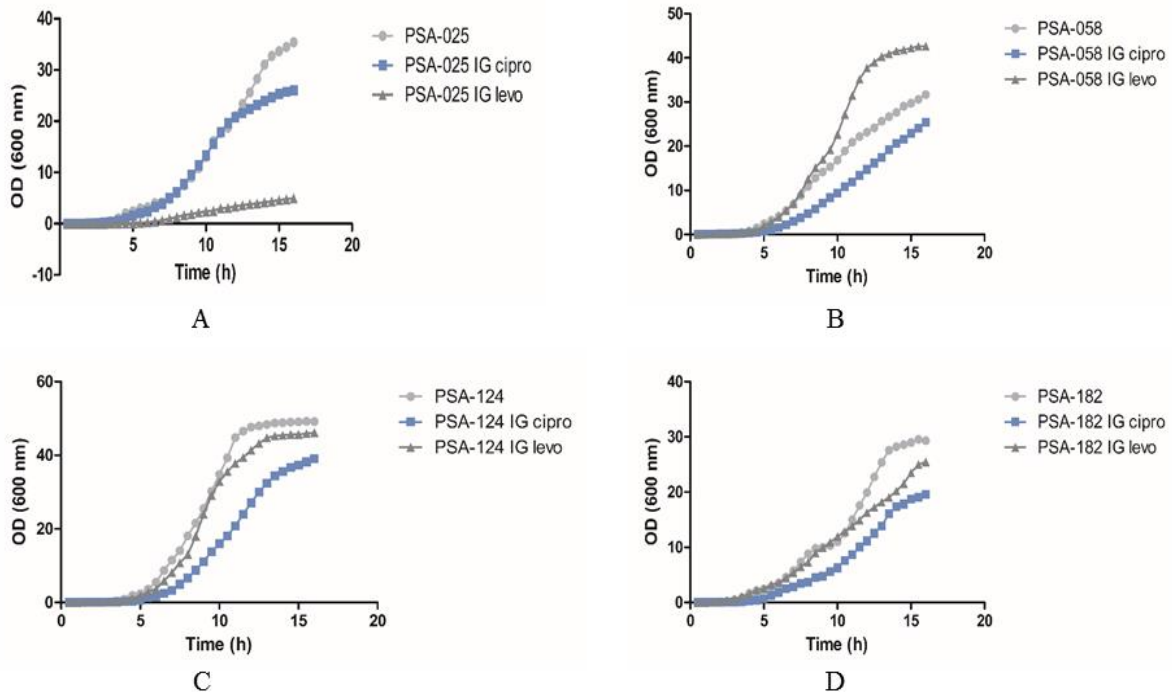

Figure S13: Fitness cost assay results of isolates PSA-025, PSA-058, PSA-124, and PSA-182 compared to their induced mutants

IG cipro: induced against ciprofloxacin; IG levo: induced against levofloxacin
